# Supplementary material for: An in silico study of how histone tail conformation affects the binding affinity of ING family proteins
Source: PeerJ. 2022 Sep 30;10:e14029. doi: 10.7717/peerj.14029 (PMC9528904; doi:10.7717/peerj.14029)
Supplement: Supplemental Information 2 [file peerj-10-14029-s002.xlsx]

## Sheet: Data
		ING1		ING2		ING4		ING5
		Prodigy		Prodigy		Prodigy		Prodigy
		Haddock	Cluspro	Haddock	Cluspro	Haddock	Cluspro	Haddock	Cluspro
Model 1	Conformation1	-9.6	-8.6	-11.7	-11.3	-8.6	-9.6	-9.7	-9
		9.1e-08	4.8e-07	2.5e-09	5.1e-09	4.7e-07	9.7e-08	8e-08	2.3e-07
	Conformation2	-8.9	-9.7	-11.3	-11.9	-7.7	-11	-8.8	-9.1
		2.9e-07	7.7e-08	4.8e-09	1.7e-09	2.4e-06	8.5e-09	3.5e-07	2.2e-07
	Conformation3	-11.4	-14.2	-12.6	-12	-11.5	-12.6	-11.5	-11.8
		4e-09	4.1e-11	6.1e-10	1.6e-09	3.6e-09	5.5e-10	3.5e-09	2.1e-09
	Conformation4	-11.4	-12.5	-11.4	-12.8	-9.7	-11.3	-11.3	-11.2
		4.2e-09	7.3e-10	4.5e-09	4.1e-10	7.2e-08	5.6e-09	5.2e-09	6.3e-09
Model 2	Conformation1	-9.8	-8.4	-10.5	-11	-8.3	-9.6	-8.9	-9
		6.1e-08	6.7e-07	1.9e-08	9.2e-09	7.9e-07	8.7e-08	3e-07	2.7e-07
	Conformation2	-9.5	-9.4	-10.7	-11.2	-8.3	-10	-8.4	-9.1
		1e-07	1.2e-07	1.3e-08	6.3e-09	8.6e-07	4.8e-08	6.9e-07	2.2e-07
	Conformation3	-11.2	-11.4	-11.8	-12	-9.5	-12.1	-10	-11.3
		5.9e-09	4.6e-09	2.1e-09	1.6e-09	1.1e-07	1.4e-09	5e-08	5.4e-09
	Conformation4	-11.8	-11.4	-11.9	-12.3	-9.5	-11.2	-11.3	-10.4
		2.3e-09	4.6e-09	2e-09	8.8e-10	1.1e-07	5.8e-09	4.8e-09	2.3e-08
Model 3	Conformation1	-9.5	-8.4	-11	-10.7	-8.3	-9.5	-8.9	-8.6
		1.1e-07	6.9e-07	8.5e-09	1.4e-08	7.9e-07	1.1e-07	2.9e-07	4.5e-07
	Conformation2	-9.3	-8.7	-11.4	-11.1	-8.5	-9.5	-8.3	-9
		1.6e-07	4e-07	4.6e-09	7.4e-09	5.6e-07	1e-07	8.1e-07	2.7e-07
	Conformation3	-11	-12.5	-13.7	-11.7	-10.3	-11.7	-10.3	-11.8
		8.9e-09	7.3e-10	9.6e-11	2.6e-09	2.6e-08	2.6e-09	2.7e-08	2.1e-09
	Conformation4	-11.8	-11.2	-12.6	-12.3	-9	-11	-10.5	-11
		2.2e-09	6.3e-09	6.1e-10	9.4e-10	2.4e-07	8.4e-09	1.8e-08	8.3e-09
Model 4	Conformation1	-9	-8.4	-11	-10.4	-7.9	-9.2	-9.5	-8.4
		2.3e-07	7.5e-07	8.5e-09	2.2e-08	1.6e-06	1.7e-07	1.2e-07	7.5e-07
	Conformation2	-9.4	-7.8	-11.9	-10.2	-7.6	-9.4	-9	-8.8
		1.2e-07	1.8e-06	1.8e-09	3.3e-08	2.5e-06	1.3e-07	2.6e-07	3.7e-07
	Conformation3	-11.3	-11.4	-12.4	-11.2	-10.3	-11.4	-11.2	-10.7
		4.9e-09	4.6e-09	7.5e-10	6.5e-09	2.9e-08	4.5e-09	6.2e-09	1.3e-08
	Conformation4	-11.1	-11	-12.3	-12	-10.2	-11	-10.7	-10.9
		7.7e-09	7.9e-09	1e-09	1.7e-09	3e-08	9e-09	1.3e-08	9.6e-09

## Sheet: deltaG (4histone)
		ING1		ING2		ING4		ING5
		Haddock	Cluspro	Haddock	Cluspro	Haddock	Cluspro	Haddock	Cluspro
Model 1	Conformation1	-9.6	-8.6	-11.7	-11.3	-8.6	-9.6	-9.7	-9
	Conformation2	-8.9	-9.7	-11.3	-11.9	-7.7	-11	-8.8	-9.1
	Conformation3	-11.4	-14.2	-12.6	-12	-11.5	-12.6	-11.5	-11.8
	Conformation4	-11.4	-12.5	-11.4	-12.8	-9.7	-11.3	-11.3	-11.2
Model 2	Conformation1	-9.8	-8.4	-10.5	-11	-8.3	-9.6	-8.9	-9
	Conformation2	-9.5	-9.4	-10.7	-11.2	-8.3	-10	-8.4	-9.1
	Conformation3	-11.2	-11.4	-11.8	-12	-9.5	-12.1	-10	-11.3
	Conformation4	-11.8	-11.4	-11.9	-12.3	-9.5	-11.2	-11.3	-10.4
Model 3	Conformation1	-9.5	-8.4	-11	-10.7	-8.3	-9.5	-8.9	-8.6
	Conformation2	-9.3	-8.7	-11.4	-11.1	-8.5	-9.5	-8.3	-9
	Conformation3	-11	-12.5	-13.7	-11.7	-10.3	-11.7	-10.3	-11.8
	Conformation4	-11.8	-11.2	-12.6	-12.3	-9	-11	-10.5	-11
Model 4	Conformation1	-9	-8.4	-11	-10.4	-7.9	-9.2	-9.5	-8.4
	Conformation2	-9.4	-7.8	-11.9	-10.2	-7.6	-9.4	-9	-8.8
	Conformation3	-11.3	-11.4	-12.4	-11.2	-10.3	-11.4	-11.2	-10.7
	Conformation4	-11.1	-11	-12.3	-12	-10.2	-11	-10.7	-10.9

## Sheet: Kd (Log10) (4 histone)
		ING1		ING2		ING4		ING5
		Haddock	Cluspro	Haddock	Cluspro	Haddock	Cluspro	Haddock	Cluspro
Model 1	Conformation1	-7.04096	-6.31876	-8.60206	-8.29243	-6.3279	-7.01323	-7.09691	-6.63827
	Conformation2	-6.5376	-7.11351	-8.31876	-8.76955	-5.61979	-8.07058	-6.45593	-6.65758
	Conformation3	-8.39794	-10.3872	-9.21467	-8.79588	-8.4437	-9.25964	-8.45593	-8.67778
	Conformation4	-8.37675	-9.13668	-8.34679	-9.38722	-7.14267	-8.25181	-8.284	-8.20066
Model 2	Conformation1	-7.21467	-6.17393	-7.72125	-8.03621	-6.10237	-7.06048	-6.52288	-6.56864
	Conformation2	-7	-6.92082	-7.88606	-8.20066	-6.0655	-7.31876	-6.16115	-6.65758
	Conformation3	-8.22915	-8.33724	-8.67778	-8.79588	-6.95861	-8.85387	-7.30103	-8.26761
	Conformation4	-8.63827	-8.33724	-8.69897	-9.05552	-6.95861	-8.23657	-8.31876	-7.63827
Model 3	Conformation1	-6.95861	-6.16115	-8.07058	-7.85387	-6.10237	-6.95861	-6.5376	-6.34679
	Conformation2	-6.79588	-6.39794	-8.33724	-8.13077	-6.25181	-7	-6.09151	-6.56864
	Conformation3	-8.05061	-9.13668	-10.0177	-8.58503	-7.58503	-8.58503	-7.56864	-8.67778
	Conformation4	-8.65758	-8.20066	-9.21467	-9.02687	-6.61979	-8.07572	-7.74473	-8.08092
Model 4	Conformation1	-6.63827	-6.12494	-8.07058	-7.65758	-5.79588	-6.76955	-6.92082	-6.12494
	Conformation2	-6.92082	-5.74473	-8.74473	-7.48149	-5.60206	-6.88606	-6.58503	-6.4318
	Conformation3	-8.3098	-8.33724	-9.12494	-8.18709	-7.5376	-8.34679	-8.20761	-7.88606
	Conformation4	-8.11351	-8.10237	-9	-8.76955	-7.52288	-8.04576	-7.88606	-8.01773
